# Supplementary material for: A Streamlined Method to Obtain Biologically Active TcdA and TcdB Toxins from Clostridioides difficile
Source: MDPI journal article supplement (doi:10.3390/toxins16010038), 2024-01-11
Supplement: s1 [file s1]

# Supplementary Materials: A Streamlined Method to Obtain Biologically Active TcdA and TcdB Toxins from *Clostridioides difficile*

Diane Sapa, Anaïs Brosse, Héloïse Coullon, Gauthier Péan de Ponfilly, Thomas Candela and Alban Le Monnier

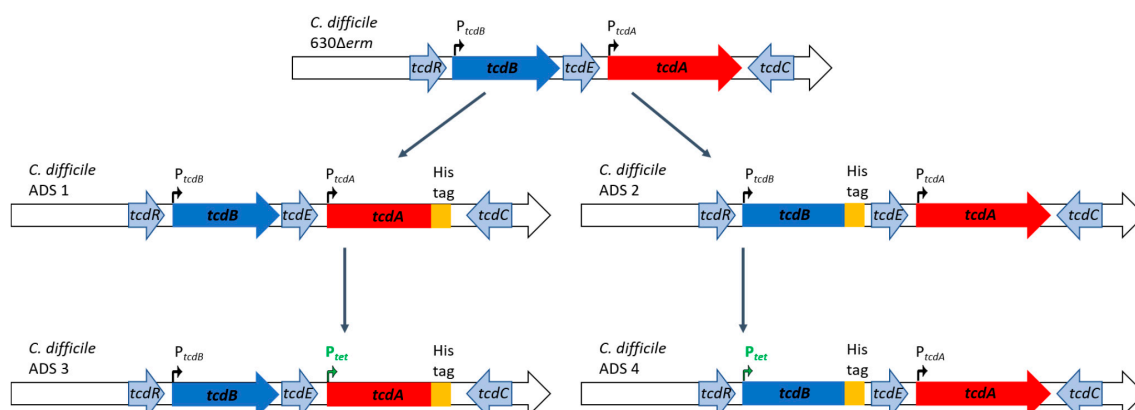

**Figure S1.** Strain construction for the production of the recombinant toxins rTcdA and rTcdB of *C. difficile*. The strains were obtained in two steps using the allele exchange method. Strains ADS1 and ADS2 were obtained by adding a His-tag at the 3' end of the *tcdA* or *tcdB* genes of the *C. difficile* strain 630Δ*erm*. Strains ADS3 and ADS4 were obtained by replacing the respective promoter of *tcdA* and *tcdB* by the promoter  $P_{tet}$  inducible to anhydro-tetracycline (ATc). ADS3 and ADS4 were used for the purification of recombinant toxin A (rTcdA) and B (rTcdB).

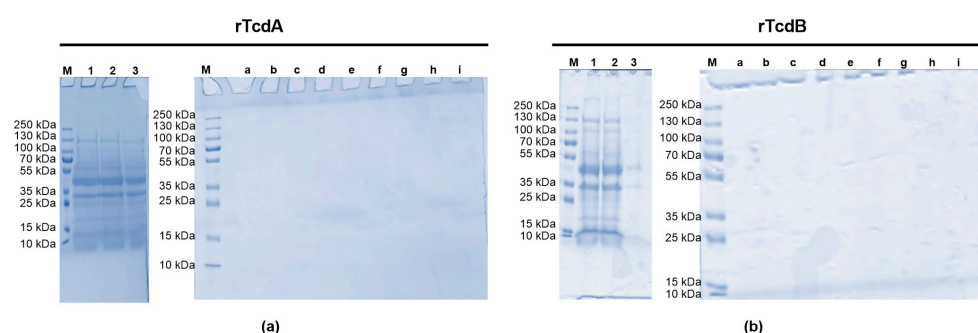

**Figure S2.** Purification of recombinant His-tagged toxins by Ni-NTA affinity chromatography under denaturing conditions from the genetic construction without the  $P_{tet}$  promoter. Toxins were visualized by Coomassie staining for (A) recombinant toxin A (rTcdA); (B) recombinant toxin B (rTcdB). M: PageRuler Plus marker (ThermoFisher) / 1: raw protein samples / 2: flow through / 3: wash. Imidazole eluted fractions: a: 10 mM / b: 20 mM / c: 30 mM / d: 40 mM / e: 60 mM / f: 80 mM / g: 100 mM / h: 200 mM / i: 1 M.

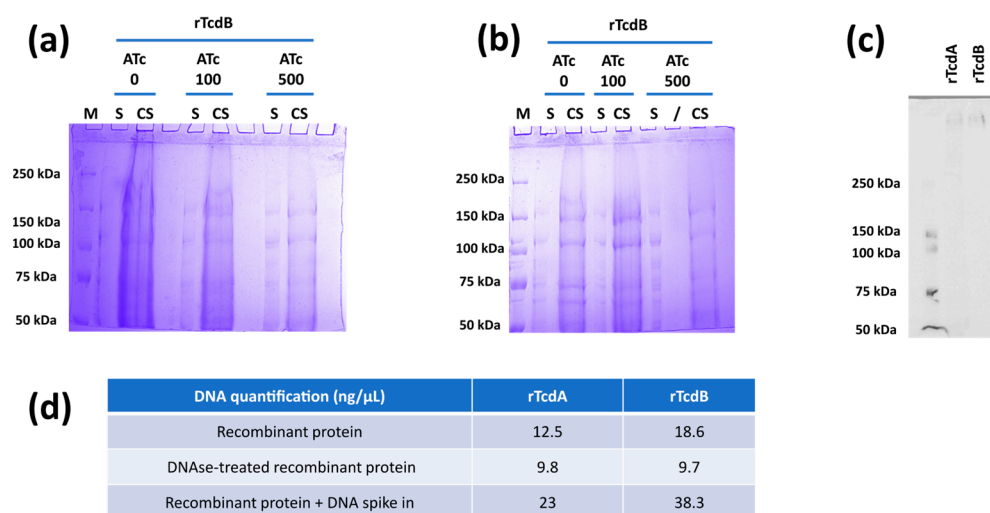

**Figure S3.** Validation of the recombinant protein extraction method. Absence of recombinant proteins in culture supernatant was confirmed for rTcdA and rTcdB (panels **a** and **b** respectively). Specificity of extracted recombinant proteins was confirmed by His-tag directed western-blot (panel **c**). DNA contamination in the extracted protein samples was estimated by DNA quantification using the nanodrop before and after DNase treatment, using spiked-in DNA as a control (panel **d**). For experimental details, see Supplemental File S2. M: Page Ruler Plus ladder (ThermoFisher), S: raw culture supernatant, CS: Concentrated supernatant after protein precipitation.

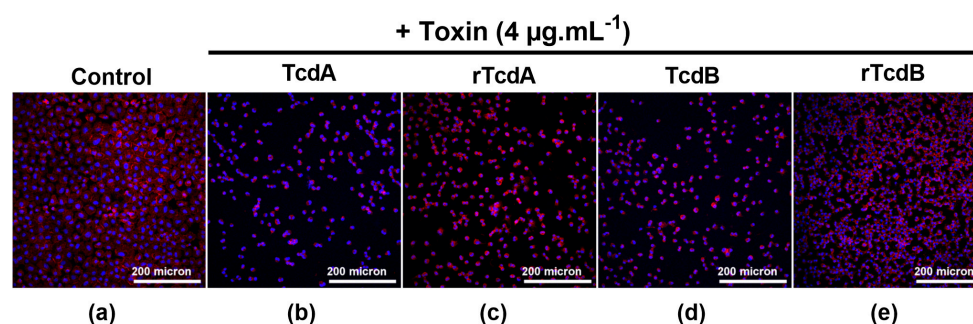

**Figure S4.** Disruption of cytoskeleton on Vero cells with 20x objective. Cells in 24 wells plate were in the absence of toxin (panel **a** = control) or in the presence of 4 μg.mL<sup>-1</sup> of either native or recombinant toxins **A** (panel **b** = native / panel **c** = recombinant) and **B** (panel **d** = native / panel **e** = recombinant). Cells were incubated for 18 hours, fixed, and stained with Rhodamine Phalloidin (actin staining in red) and DAPI (nuclei staining in blue) then observed under confocal microscopy with 20x objective to quantify the effect of toxins on the cells.

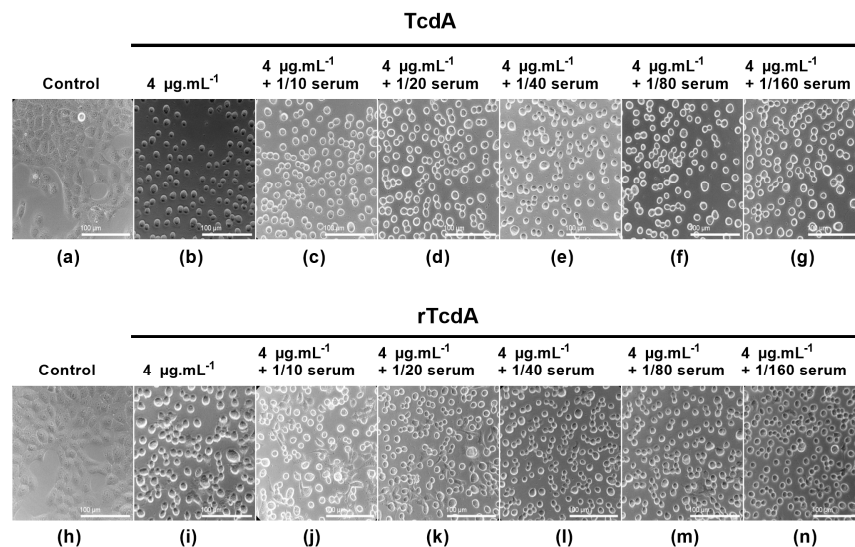

**Figure S5.** Serum without anti-TcdA neutralizing IgG does not neutralize TcdA toxins activity. Toxins were preincubated with several sera from a CDI-convalescent patient using dilutions ranging from 1/10 (panels **c** and **j**) to 1/160 (panels **g** and **n**) before addition to Vero cell monolayers. Native VPI 10463 TcdA and recombinant TcdA were compared (panels **b-g** and **i-n** respectively). Cells incubated without toxins (panels **a** and **h**) were included as a negative control. Cells incubated with non-neutralized toxins were included as a positive control (panels **b** and **i**). Morphological changes were observed under phase contrast microscopy after 18 h at 37 °C.

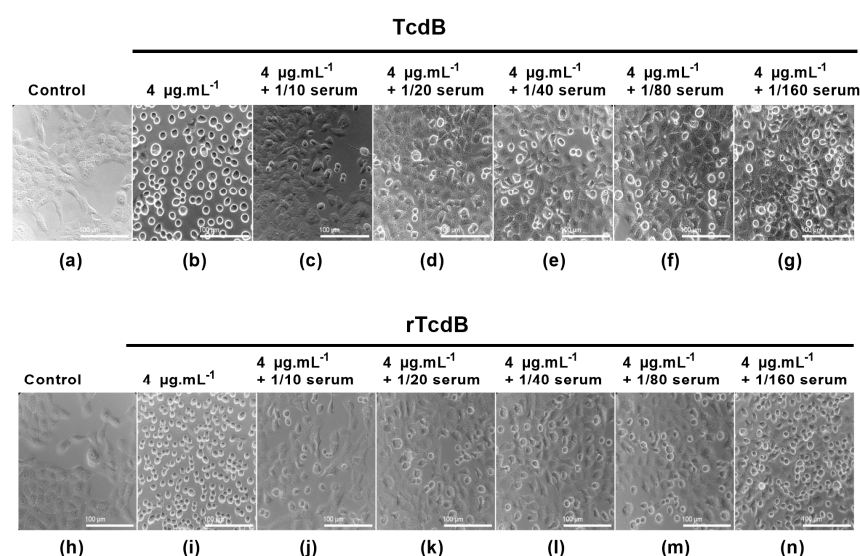

**Figure S6.** Serum with anti-TcdB neutralizing IgG neutralizes both native and recombinant TcdB activity. Toxins were preincubated with several sera from a CDI-convalescent patient using dilutions ranging from 1/10 (panels **c** and **j**) to 1/160 (panels **g** and **n**) before addition to Vero cell monolayers. Native VPI 10463 TcdB and recombinant TcdB were compared (panels **b-g** and **i-n** respectively). Cells incubated without toxins (panels **a** and **h**) were included as a negative control. Cells incubated with non-neutralized toxins were included as a positive control (panels **b** and **i**). Morphological changes were observed under phase contrast microscopy after 18 h at 37 °C.

**Table S1.** List of bacterial strains used in this study.

| Strains          | Characteristics                                                                                                                                                  | Reference(s)/source |
|------------------|------------------------------------------------------------------------------------------------------------------------------------------------------------------|---------------------|
| TG1              | <i>E. coli</i> SupE <i>hsd</i> Δ5 <i>thi</i> Δ(lac-proAB) <i>F'</i> [ <i>tra</i> 36 <i>pro</i> <i>AB</i> <sup>+</sup> <i>lacI</i> <sup>q</sup> <i>lacZ</i> ΔM15] | [59]                |
| HB101 <i>tra</i> | <i>E. coli</i> , F-Δ (gpt-proA) 62 LEU B6 gln V44 ara-14 gal-K2 lacY1 delta (mcrC-mrr) rps L20 (srtr) xyl-5 mLt-1 recA13, pRK24 (transfer function)              | Laboratory          |
| 630Δ <i>erm</i>  | <i>C. difficile</i> , Wild-type strain sensible to erythromycin                                                                                                  | Laboratory          |
| AD1              | <i>C. difficile</i> , 630Δ <i>erm</i> with 6xhis-tag in the 3' end of <i>tcdA</i>                                                                                | This study          |
| AD2              | <i>C. difficile</i> , 630Δ <i>erm</i> with 6xhis-tag in the 3' end of <i>tcdB</i>                                                                                | This study          |
| AD3              | <i>C. difficile</i> strain AD1 with <i>tcdA</i> native promoter replaced with P <sub>tet</sub> promoter (630Δ <i>erm</i> P <sub>tet</sub> -TcdA_his tag)         | This study          |
| AD4              | <i>C. difficile</i> strain AD2 with <i>tcdB</i> native promoter replaced with P <sub>tet</sub> promoter (630Δ <i>erm</i> P <sub>tet</sub> -TcdB_his tag)         | This study          |

**Table S2.** List of primers used in this study.

| Name | Sequence 5' – 3'                                                            | Utilization                                                                       |
|------|-----------------------------------------------------------------------------|-----------------------------------------------------------------------------------|
| 2836 | ctgcaccgggGAGACCGGAAAAGATCCGGGGG-GATCGATCCTCTAG                             | Primer for amplification of the spectinomycin cassette                            |
| 2837 | catgtcgcattgcGAGACCTTAGCCTAATTGAGA-GAAGTTTCTATAG                            | Primer for amplification of the spectinomycin cassette                            |
| 2854 | GGCTACGGTCTCCCCGGGgcctcaactggttata-caagtattaatgg                            | Primer for the amplification of PCR fragment 1 for pADS1 construction             |
| 2851 | GGCTACGGTCTCCGGCAttaG-tGGTGATGGTGATGGTGATGgcatatatccaggggctttactcc          | Primer for the amplification of PCR fragment 1 for pADS1 construction             |
| 2852 | GGCTACGGTCTCCTGCCaatatatgttga-taaaaattattcctgtg                             | Primer for for amplification of PCR fragment 2 for pADS1 construction             |
| 2853 | GGCTACGGTCTCGCATGCggtaacgaatttag-taatgaaggaaaagg                            | Primer for amplification of PCR fragment 2 for pADS1 construction                 |
| 2858 | GGCTACGGTCTCCCCGGGgctgaaacgga-gaaatgcaaataggag                              | Primer for amplification of PCR fragment 1 for pADS2 construction                 |
| 2859 | GGCTACGGTCTCCGGCAttaG-tGGTGATGGTGATGGTGATGttcactaatcactaattgagctgtatcaggatc | Primer for amplification of PCR fragment 1 for pADS2 construction                 |
| 2860 | GGCTACGGTCTCCTGCCataaaaa-tatgttaaatatattcttataacttaa                        | Primer for amplification of PCR fragment 2 for pADS2 construction                 |
| 2861 | GGCTACGGTCTCGCATGCgtccttcacacgtattttgtgttttg                                | Primer for amplification of PCR fragment 2 for pADS2 construction                 |
| 3046 | gatgagaagggcataatgggctacgggtctctttgc                                        | Forward primer for CO1 fragment amplification for pADS3 construction              |
| 3047 | ttacttttcatccttagcattcggtacgggtctcttcttattttatgctagc                        | Reverse primer for CO1 fragment amplification for pADS3 construction              |
| 3048 | taagaagcctgcatttgcagggtacgggtctc                                            | Forward primer for P <sub>tet</sub> fragment amplification for pADS3 construction |
| 3049 | aaagacataaaattttctcttactgcaggggtacgggtctcg                                  | Reverse primer for P <sub>tet</sub> fragment amplification for pADS3 construction |
| 3050 | ctttaatatctaaagaagagttaataaaacgggtacgggtctcg                                | Forward primer for CO2 fragment amplification for pADS3 construction              |
| 3051 | ctgccgcctctaattttatcatttccgggtacgggtctc                                     | Reverse primer for CO2 fragment amplification for pADS3 construction              |

|           |                                                                              |                                                                                                                                                            |
|-----------|------------------------------------------------------------------------------|------------------------------------------------------------------------------------------------------------------------------------------------------------|
| 3052      | ttatgtaattgttacttgaaaattgatcggtctacgggtctcattgc                              | Forward primer for CO1 fragment amplification for pADS4 construction                                                                                       |
| 3053      | ttacaagttaaataattttcatagtccttttttattttttaaatgggctac-ggtctcgtcttattttatgctagc | Reverse primer for CO1 fragment amplification for pADS4 construction                                                                                       |
| 3054      | aagaagcctgcatttgcagggctacgggtctcg                                            | Forward primer for P <sub>tet</sub> fragment amplification for pADS4 construction                                                                          |
| 3055      | aaaattttctcctttactgcaggggctacgggtctcgactaaactcat                             | Reverse primer for P <sub>tet</sub> fragment amplification for pADS4 construction                                                                          |
| 3056      | tagttaatagaaaacagttagaaaaaatgggctacgggtctcg                                  | Forward primer for CO2 fragment amplification for pADS4 construction                                                                                       |
| 3057      | tgttctgaggtatattctggggctacgggtctcttgcc                                       | Reverse primer for CO2 fragment amplification for pADS4 construction                                                                                       |
| 3064      | tatacaattgagactggatggat                                                      | Forward primer outside CO1 fragment to verify P <sub>tet</sub> promoter's insertion in front of <i>tcdA</i> in <i>C. difficile</i>                         |
| 3065      | aatatctcagatttttctcttt                                                       | Reverse primer outside CO2 to verify P <sub>tet</sub> promoter's insertion in front of <i>tcdA</i> in <i>C. difficile</i>                                  |
| 3066      | gtcttgaaaatatttagtttgaa                                                      | Forward primer outside CO1 fragment to verify P <sub>tet</sub> promoter's insertion in front of <i>tcdB</i> in <i>C. difficile</i>                         |
| 3067      | attttaacttctagtggtgatgc                                                      | Reverse primer outside CO2 to verify P <sub>tet</sub> promoter's insertion in front of <i>tcdB</i> in <i>C. difficile</i>                                  |
| 3068      | ctgttttctgtaggccgtgt                                                         | Forward primer inside P <sub>tet</sub> promoter to verify P <sub>tet</sub> 's insertion in front of <i>tcdA</i> and <i>tcdB</i> in <i>C. difficile</i>     |
| 3069      | acacggcctacagaaaaacag                                                        | Reverse primer inside P <sub>tet</sub> promoter to verify P <sub>tet</sub> 's insertion in front of <i>tcdA</i> and <i>tcdB</i> in <i>C. difficile</i>     |
| 3070      | gctgtaataaggctaaaaatagagca                                                   | Forward primer inside CO1 fragment to verify P <sub>tet</sub> promoter's insertion in front of <i>tcdB</i> in <i>C. difficile</i>                          |
| 3071      | aaggctttatttctaccagattttt                                                    | Reverse primer inside CO2 to verify P <sub>tet</sub> promoter's insertion in front of <i>tcdB</i> in <i>C. difficile</i>                                   |
| 3072      | gaaagtgtatagatattaaaaatat                                                    | Forward primer inside CO1 fragment to verify P <sub>tet</sub> promoter's insertion in front of <i>tcdA</i> in <i>C. difficile</i>                          |
| 3073      | cattattgtttgtagttaacttat                                                     | Reverse primer inside CO2 to verify P <sub>tet</sub> promoter's insertion in front of <i>tcdA</i> in <i>C. difficile</i>                                   |
| 3143      | tcaaagcggcaactaagagt                                                         | Forward primer outside CO1 fragment in pJV7 vector to characterize the first Crossing-over between pADS3 and gDNA in AD3 and between pADS4 and gDNA in AD4 |
| 3144      | tgtaaacgacggccagt                                                            | Reverse primer outside CO2 fragment in pJV7 vector to characterize the first Crossing-over between pADS3 and gDNA in AD3 and between pADS4 and gDNA in AD4 |
| 3145      | tggcatctgctcctctgttttcat                                                     | Reverse primer inside <i>tcdA</i> native promoter in front of CO2 fragment to characterize the first Crossing-over between pADS3 and gDNA in AD3           |
| 3146      | aggagtgtataagatttattttc                                                      | Forward primer inside <i>tcdA</i> native promoter in front of CO2 fragment to characterize the first Crossing-over between pADS3 and gDNA in AD3           |
| 3147      | aagacactcagttgattaatttgc                                                     | Reverse primer inside <i>tcdB</i> native promoter in front of CO2 fragment to characterize the first Crossing-over between pADS4 and gDNA in AD4           |
| 3148 DS30 | gcaaattaatcaactgagtgtctt                                                     | Forward primer inside <i>tcdB</i> native promoter in front of CO2 fragment to characterize the first Crossing-over between pADS4 and gDNA in AD4           |

**Table S3.** List of Plasmids used in this study.

| Name    | Characteristics                                                                                                                                                             | Reference (s)/Source |
|---------|-----------------------------------------------------------------------------------------------------------------------------------------------------------------------------|----------------------|
| pAT28   | Spec <sup>r</sup> ori pUC ori pAmβ1 (resistance spc)                                                                                                                        | [43]                 |
| pTC129  | pBlunt+ spc (BsaI) (resistance Kn+spc)                                                                                                                                      | This study           |
| pTC130  | pMSR BamH1/XhoI +pTC129 BamH1/xhoI (resistance Cm+spc)                                                                                                                      | This study           |
| pADS1   | pTC130 with 6xhis - tag for allele exchange in <i>C. difficile</i> 630Δ <i>erm</i> to generate strain AD1                                                                   | This study           |
| pADS2   | pTC130 with 6xhis - tag for allele exchange in <i>C. difficile</i> 630Δ <i>erm</i> to generate strain AD2                                                                   | This study           |
| pRPF185 | pRPF177 with fdx transcriptional terminator added after <i>tetR</i> ,<br><i>gusA</i>                                                                                        | [46]                 |
| pJV7    | pMSR spc (BsaI) (resistance Cm+spc)                                                                                                                                         | [47]                 |
| pADS3   | P <sub>tet</sub> promoter and homologous regions cloned in pJV7 vector for allele exchange upstream of <i>tcdA</i> in <i>C. difficile</i> strain AD1 to generate strain AD3 | This study           |
| pADS4   | P <sub>tet</sub> promoter and homologous regions cloned in pJV7 vector for allele exchange upstream of <i>tcdB</i> in <i>C. difficile</i> strain AD2 to generate strain AD4 | This study           |

**Table S4.** List of Genome accession numbers used for Figure 1.

| Genome Name / Sample Name                     | Genome ID          |
|-----------------------------------------------|--------------------|
| <i>Clostridioides difficile</i> E12           | CAMZ00000000       |
| <i>Clostridioides difficile</i> E28           | CAMX00000000       |
| <i>Clostridioides difficile</i> T11           | CAML00000000       |
| <i>Clostridioides difficile</i> NAP08         | ADNX00000000       |
| <i>Clostridioides difficile</i> NAP07         | ADVM00000000       |
| <i>Clostridioides difficile</i> QCD-66c26     | CM000441           |
| <i>Clostridioides difficile</i> 630 delta erm | LN614756           |
| <i>Clostridioides difficile</i> T19           | CANA00000000       |
| <i>Clostridioides difficile</i> T61           | CAND00000000       |
| <i>Clostridioides difficile</i> QCD-97b34     | CM000657           |
| <i>Clostridioides difficile</i> T17           | CAMT00000000       |
| <i>Clostridioides difficile</i> E15           | CAMM00000000       |
| <i>Paeniclostridium sordellii</i> ATCC 9714   | APWR00000000       |
| <i>Clostridioides difficile</i> T6            | CAMR00000000       |
| <i>Clostridioides difficile</i> E24           | CAMP00000000       |
| <i>Clostridioides difficile</i> 630           | AM180355, AM180356 |
| <i>Clostridioides difficile</i> E14           | CAMS00000000       |
| <i>Clostridioides difficile</i> QCD-23m63     | CM000660           |
| <i>Clostridioides difficile</i> CD15          | FUUU00000000       |
| <i>Clostridioides difficile</i> T15           | CAMK00000000       |
| <i>Clostridioides difficile</i> CIP 107932    | CM000659           |
| <i>Clostridioides difficile</i> E25           | CAMJ00000000       |
| <i>Clostridioides difficile</i> E16           | CAMH00000000       |
| <i>Clostridioides difficile</i> QCD-32g58     | CM000287           |
| <i>Clostridioides difficile</i> T42           | CAMQ00000000       |
| <i>Clostridioides difficile</i> QCD-63q42     | CM000637           |
| <i>Clostridioides difficile</i> E23           | CAMY00000000       |
| <i>Clostridioides difficile</i> QCD-37x79     | CM000658           |
| <i>Clostridioides difficile</i> R20291        | FN545816           |
| <i>Clostridioides difficile</i> T22           | CAMI00000000       |
| <i>Clostridioides difficile</i> T10           | CANB00000000       |

|                                           |                                                                                                                                                                   |
|-------------------------------------------|-------------------------------------------------------------------------------------------------------------------------------------------------------------------|
| <i>Clostridioides difficile</i> E1        | CAMD00000000                                                                                                                                                      |
| <i>Clostridioides difficile</i> QCD-76w55 | CM000661                                                                                                                                                          |
| <i>Clostridioides difficile</i> T5        | CAMB00000000                                                                                                                                                      |
| <i>Clostridioides difficile</i> T20       | CAMC00000000                                                                                                                                                      |
| <i>Clostridioides difficile</i> E7        | CAMV00000000                                                                                                                                                      |
| <i>Clostridioides difficile</i> T23       | CAMN00000000                                                                                                                                                      |
| <i>Clostridioides difficile</i> T3        | CAMW00000000                                                                                                                                                      |
| <i>Clostridioides difficile</i> CD196     | FN538970                                                                                                                                                          |
| <i>Clostridioides difficile</i> A685      | <a href="https://mage.genoscope.cns.fr/microscope/search/export-Form.php?O_id=1276">https://mage.genoscope.cns.fr/microscope/search/export-Form.php?O_id=1276</a> |

---
