# Supplementary material for: A Streamlined Method to Obtain Biologically Active TcdA and TcdB Toxins from Clostridioides difficile
Source: MDPI journal article supplement (doi:10.3390/toxins16010038), 2024-01-11

## Sequence Identity Matrix

### TcdA

|               | tcdA_630erm | tcdA_VPI10463 | tcdA_R20291 |
|---------------|-------------|---------------|-------------|
| tcdA_630erm   | ID          | 0,998         | 0,981       |
| tcdA_VPI10463 | 0,998       | ID            | 0,981       |
| tcdA_R20291   | 0,981       | 0,981         | ID          |

### TcdB

|               | tcdB_630erm | tcdB_VPI10463 | tcdB_R20291 |
|---------------|-------------|---------------|-------------|
| tcdB_630erm   | ID          | 1,000         | 0,921       |
| tcdB_VPI10463 | 1,000       | ID            | 0,921       |
| tcdB_R20291   | 0,921       | 0,921         | ID          |

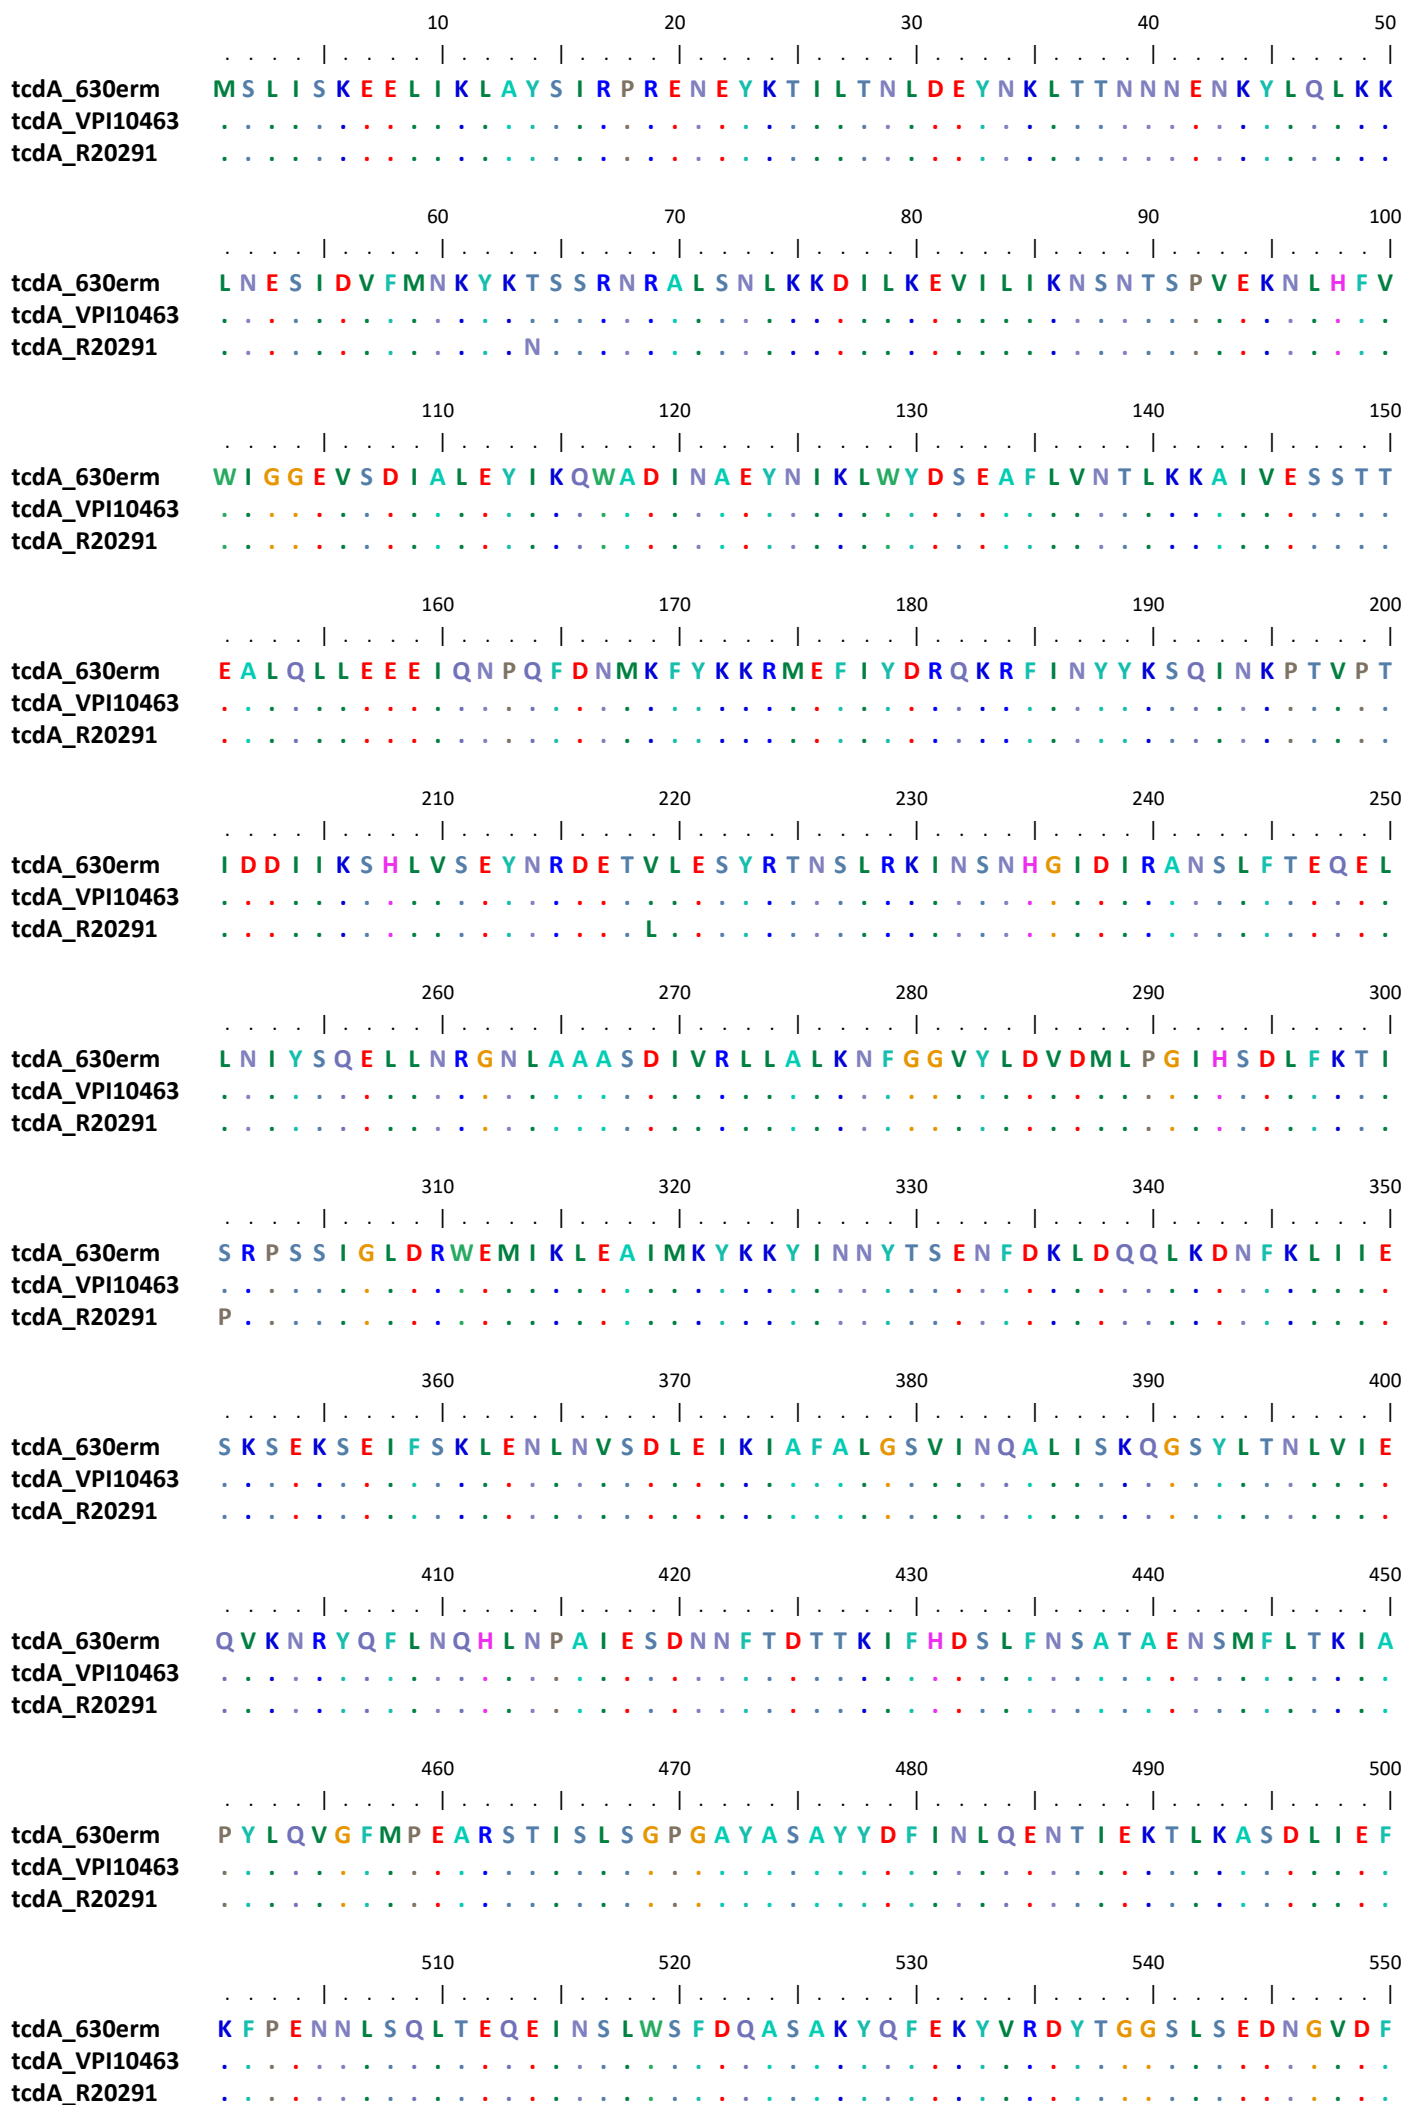

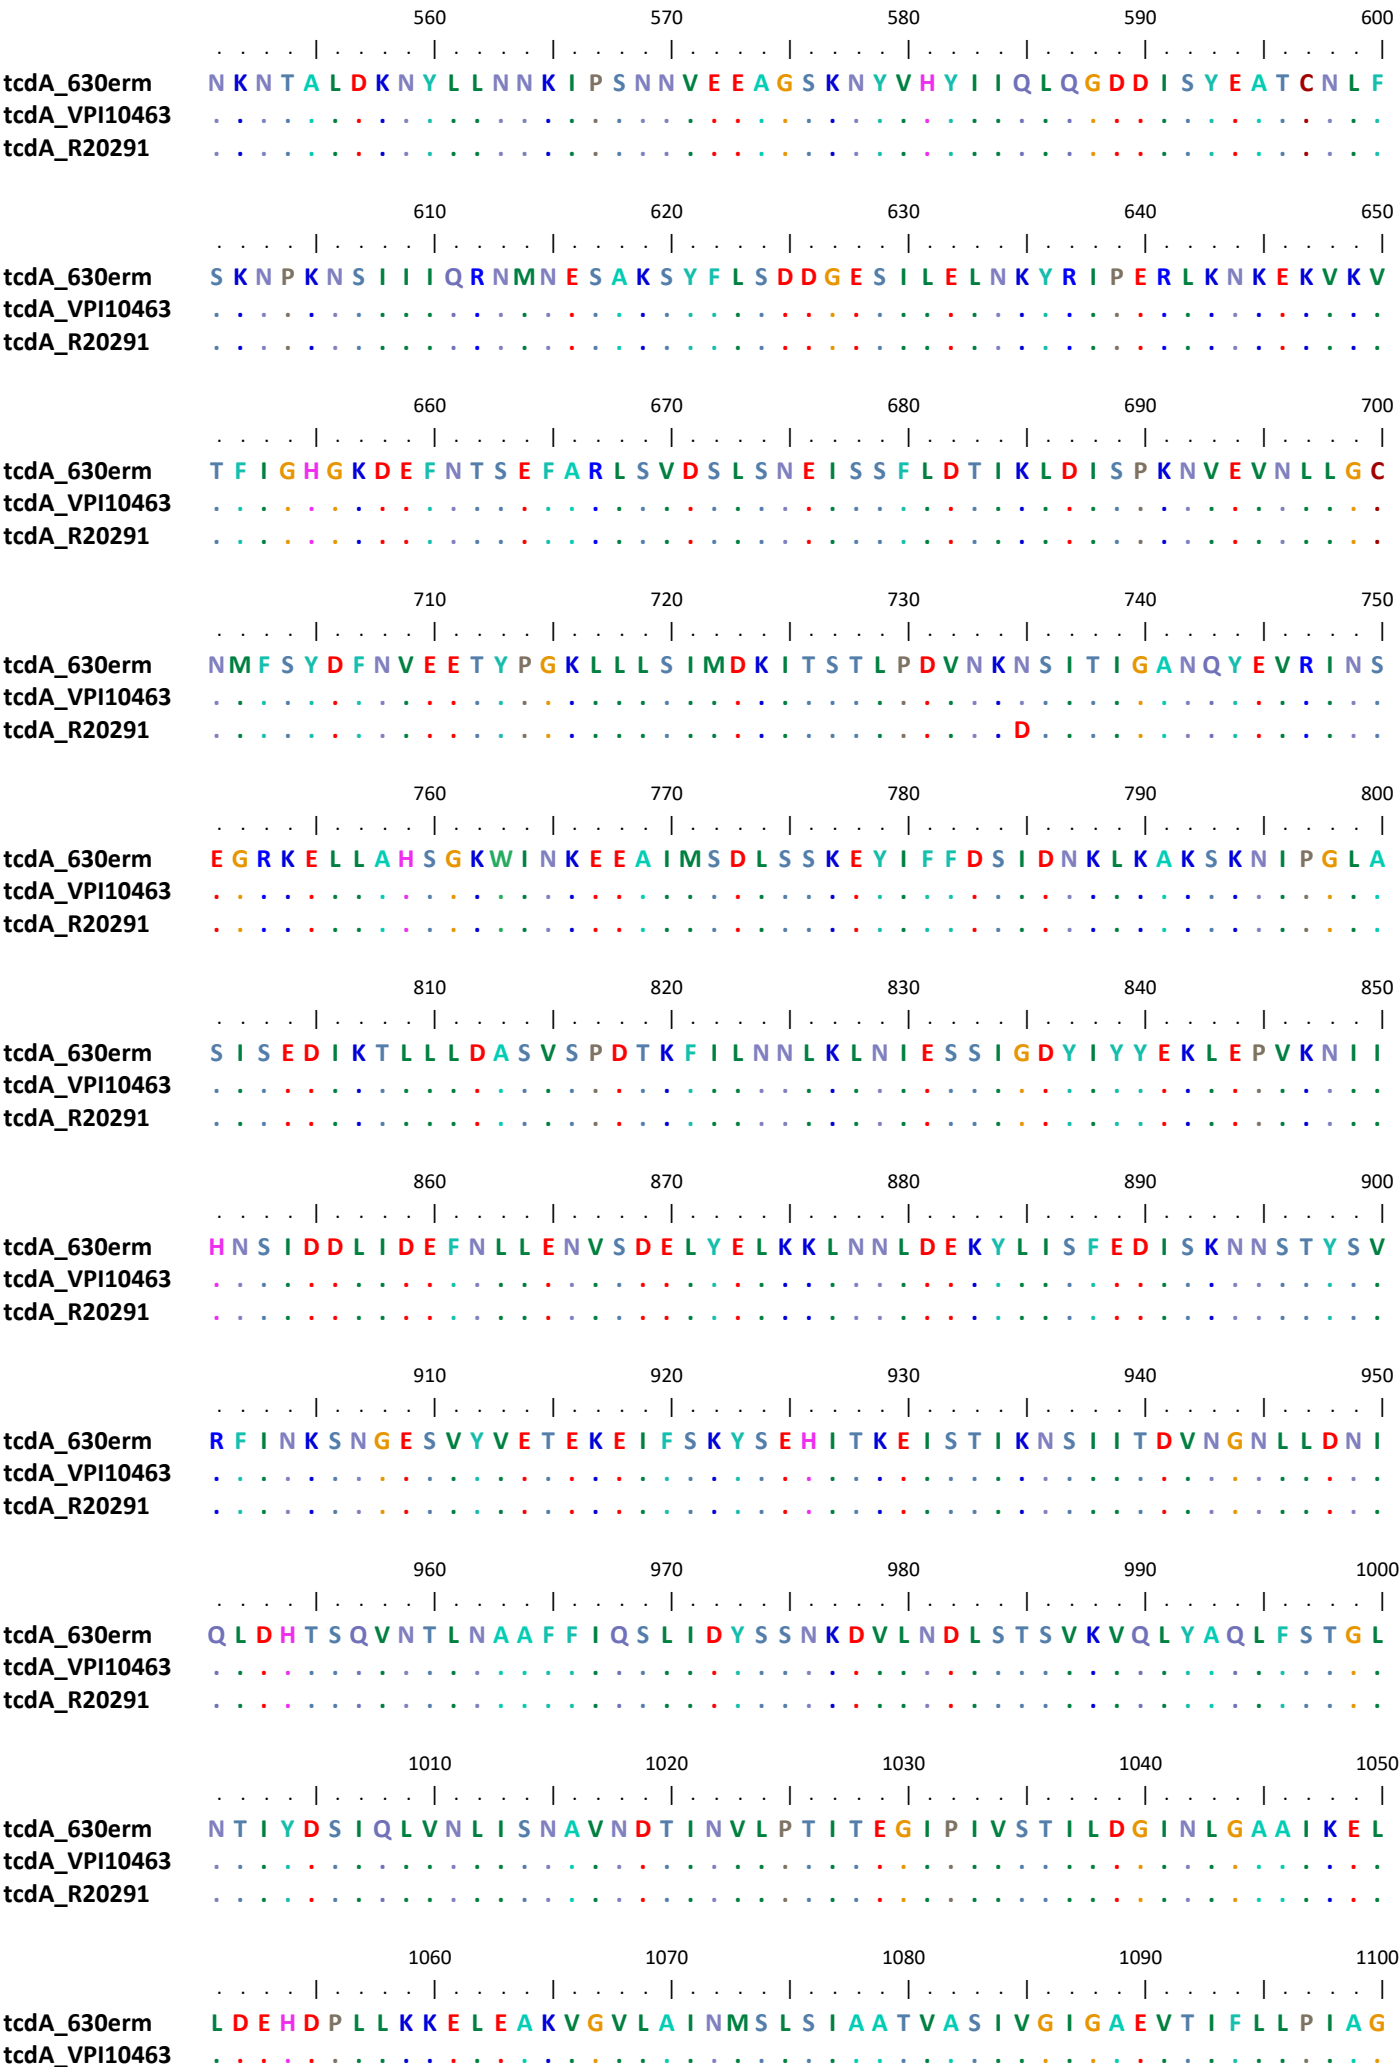

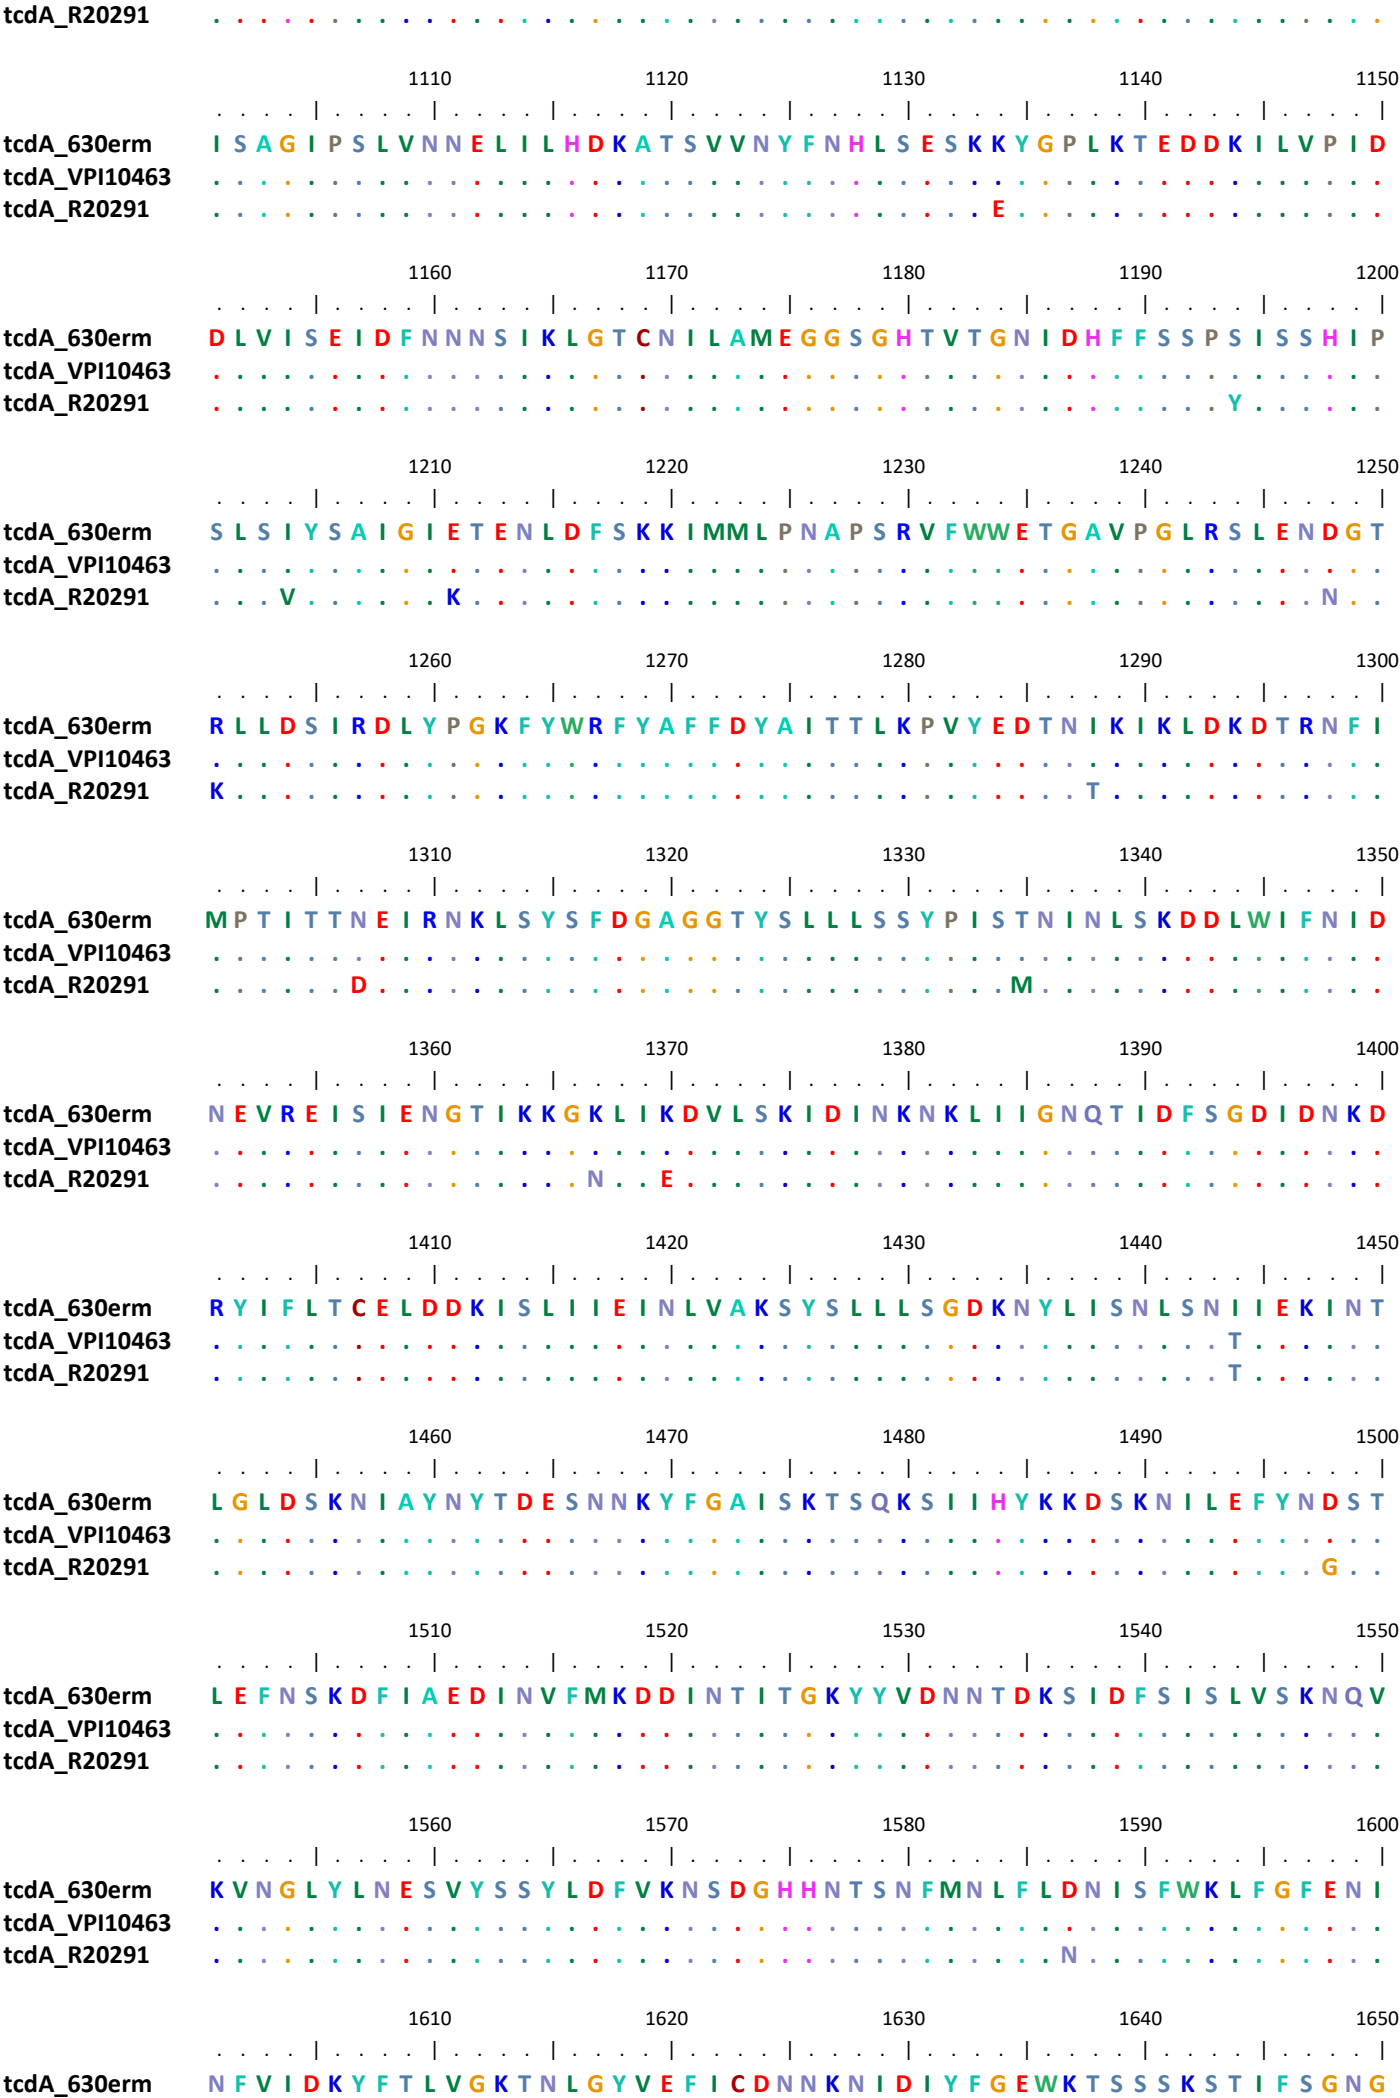

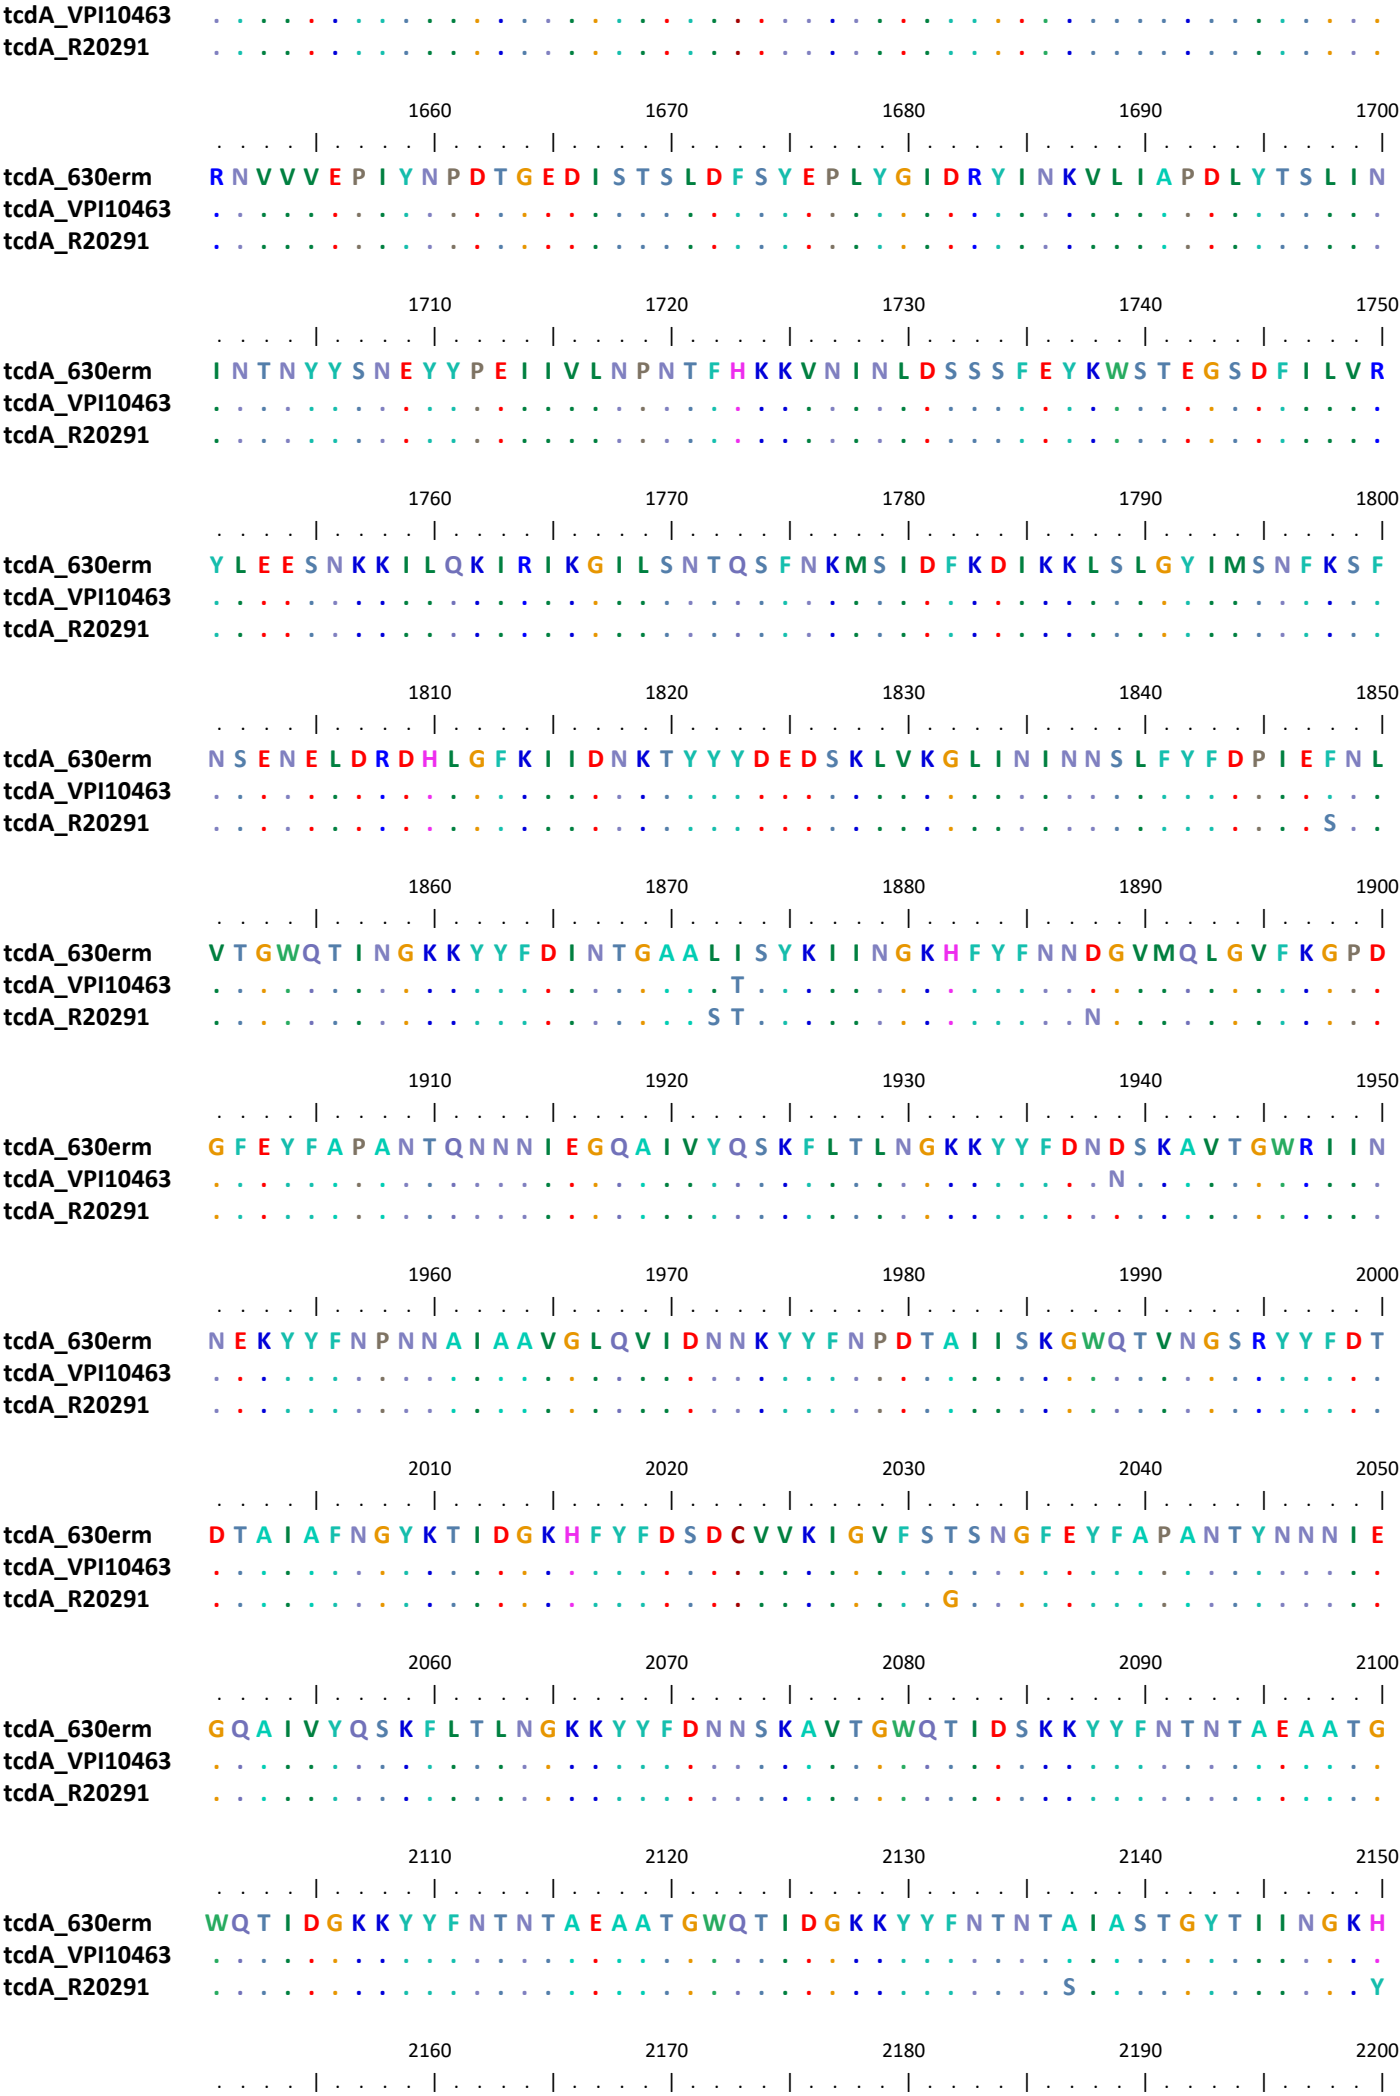

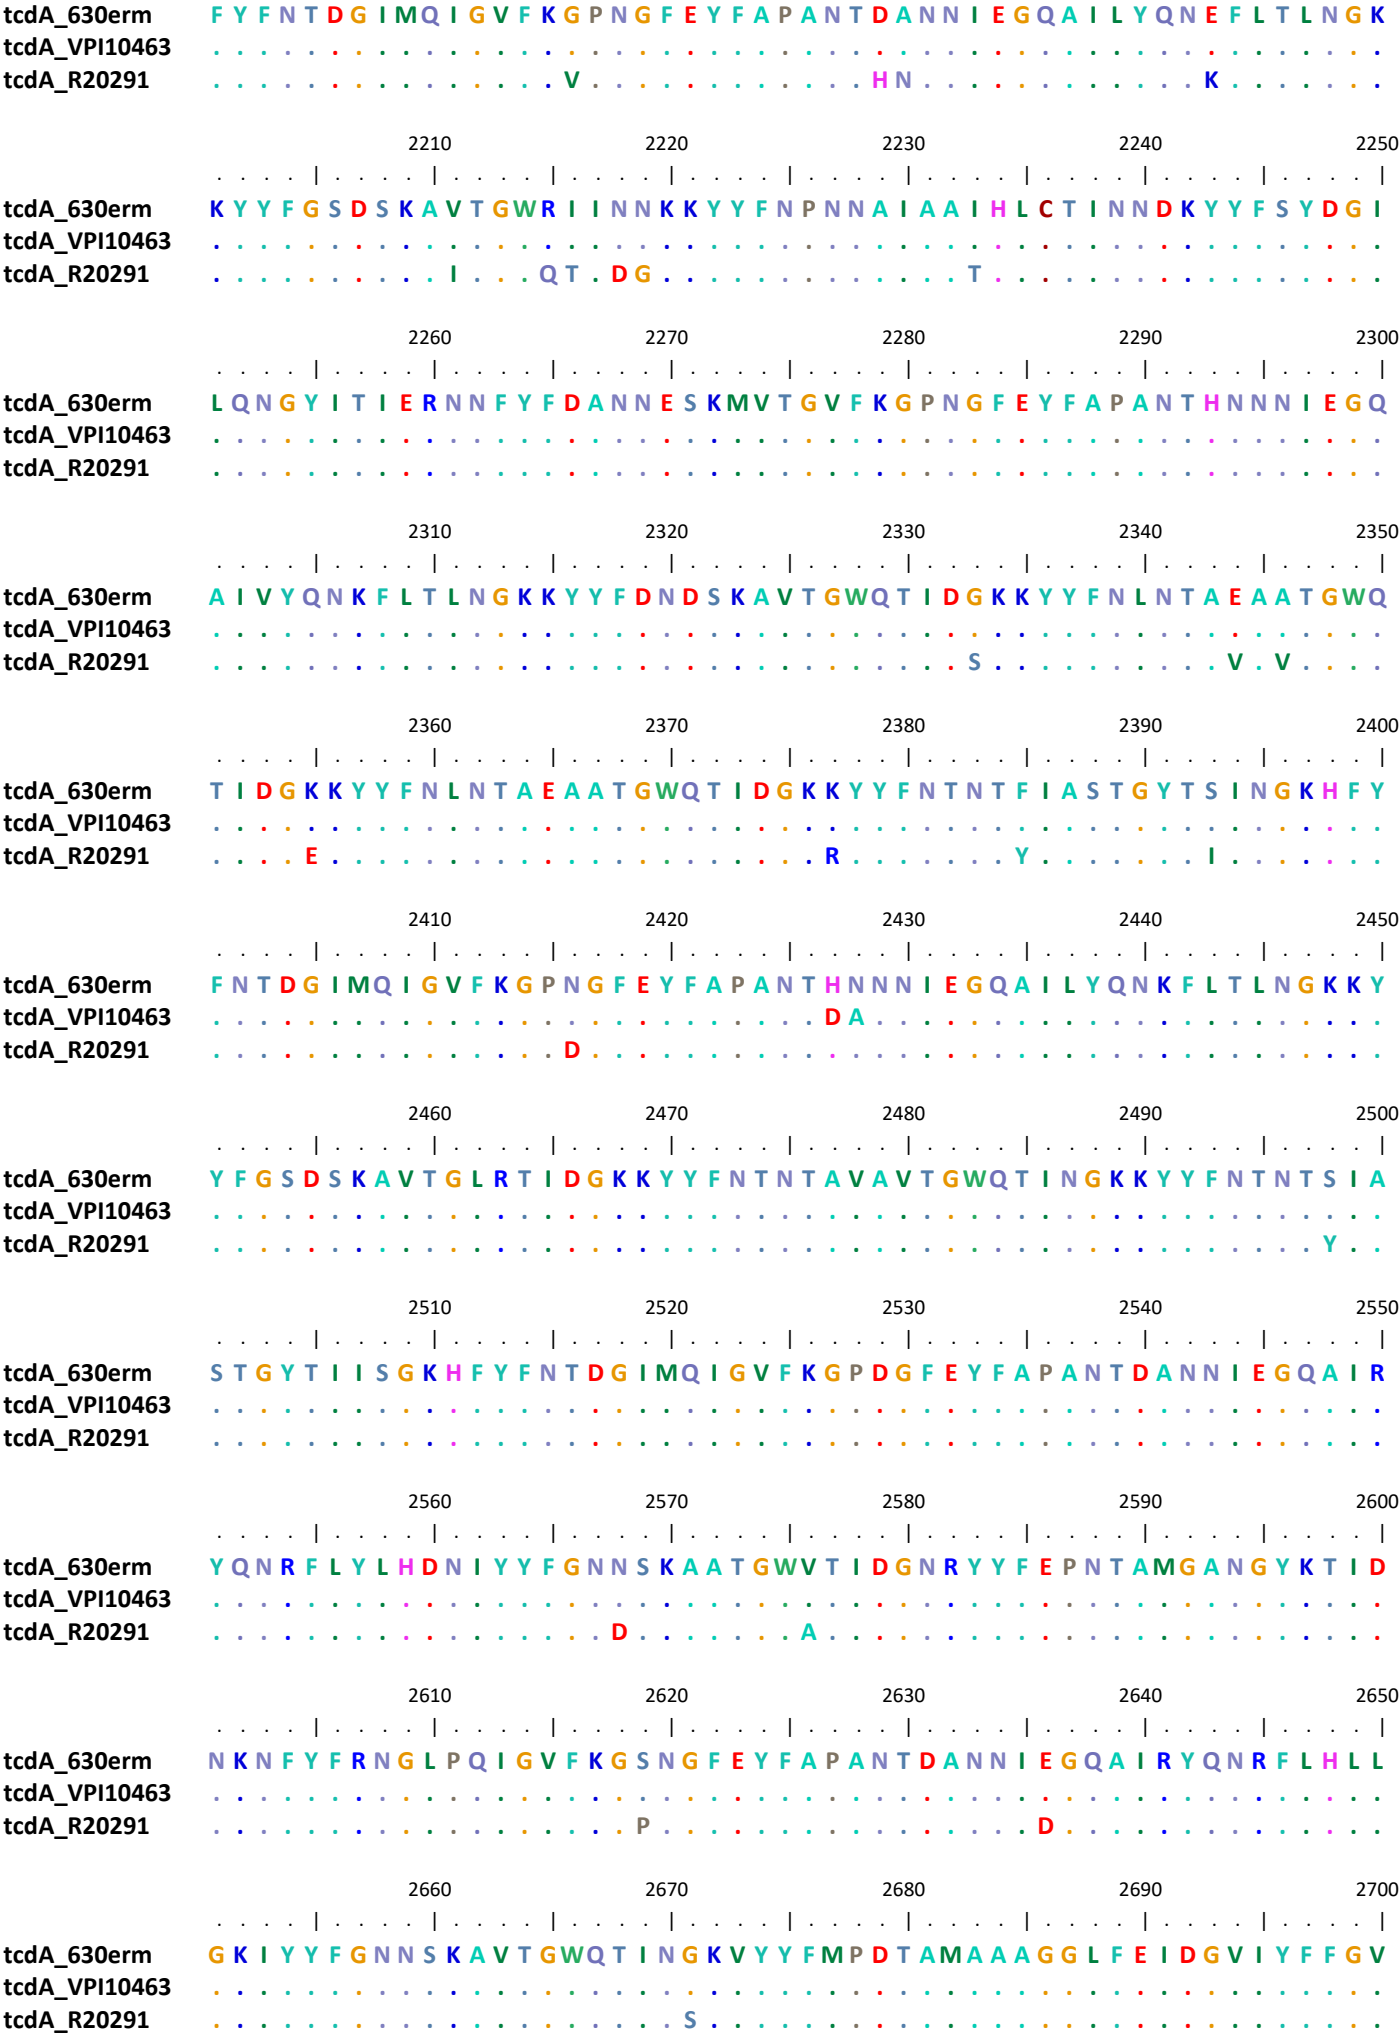

|               |                     |
|---------------|---------------------|
|               | . . . .   . . . .   |
| tcdA_630erm   | D G V K A P G I Y G |
| tcdA_VPI10463 | . . . . . . . . . . |
| tcdA_R20291   | . . . . . . . . . . |





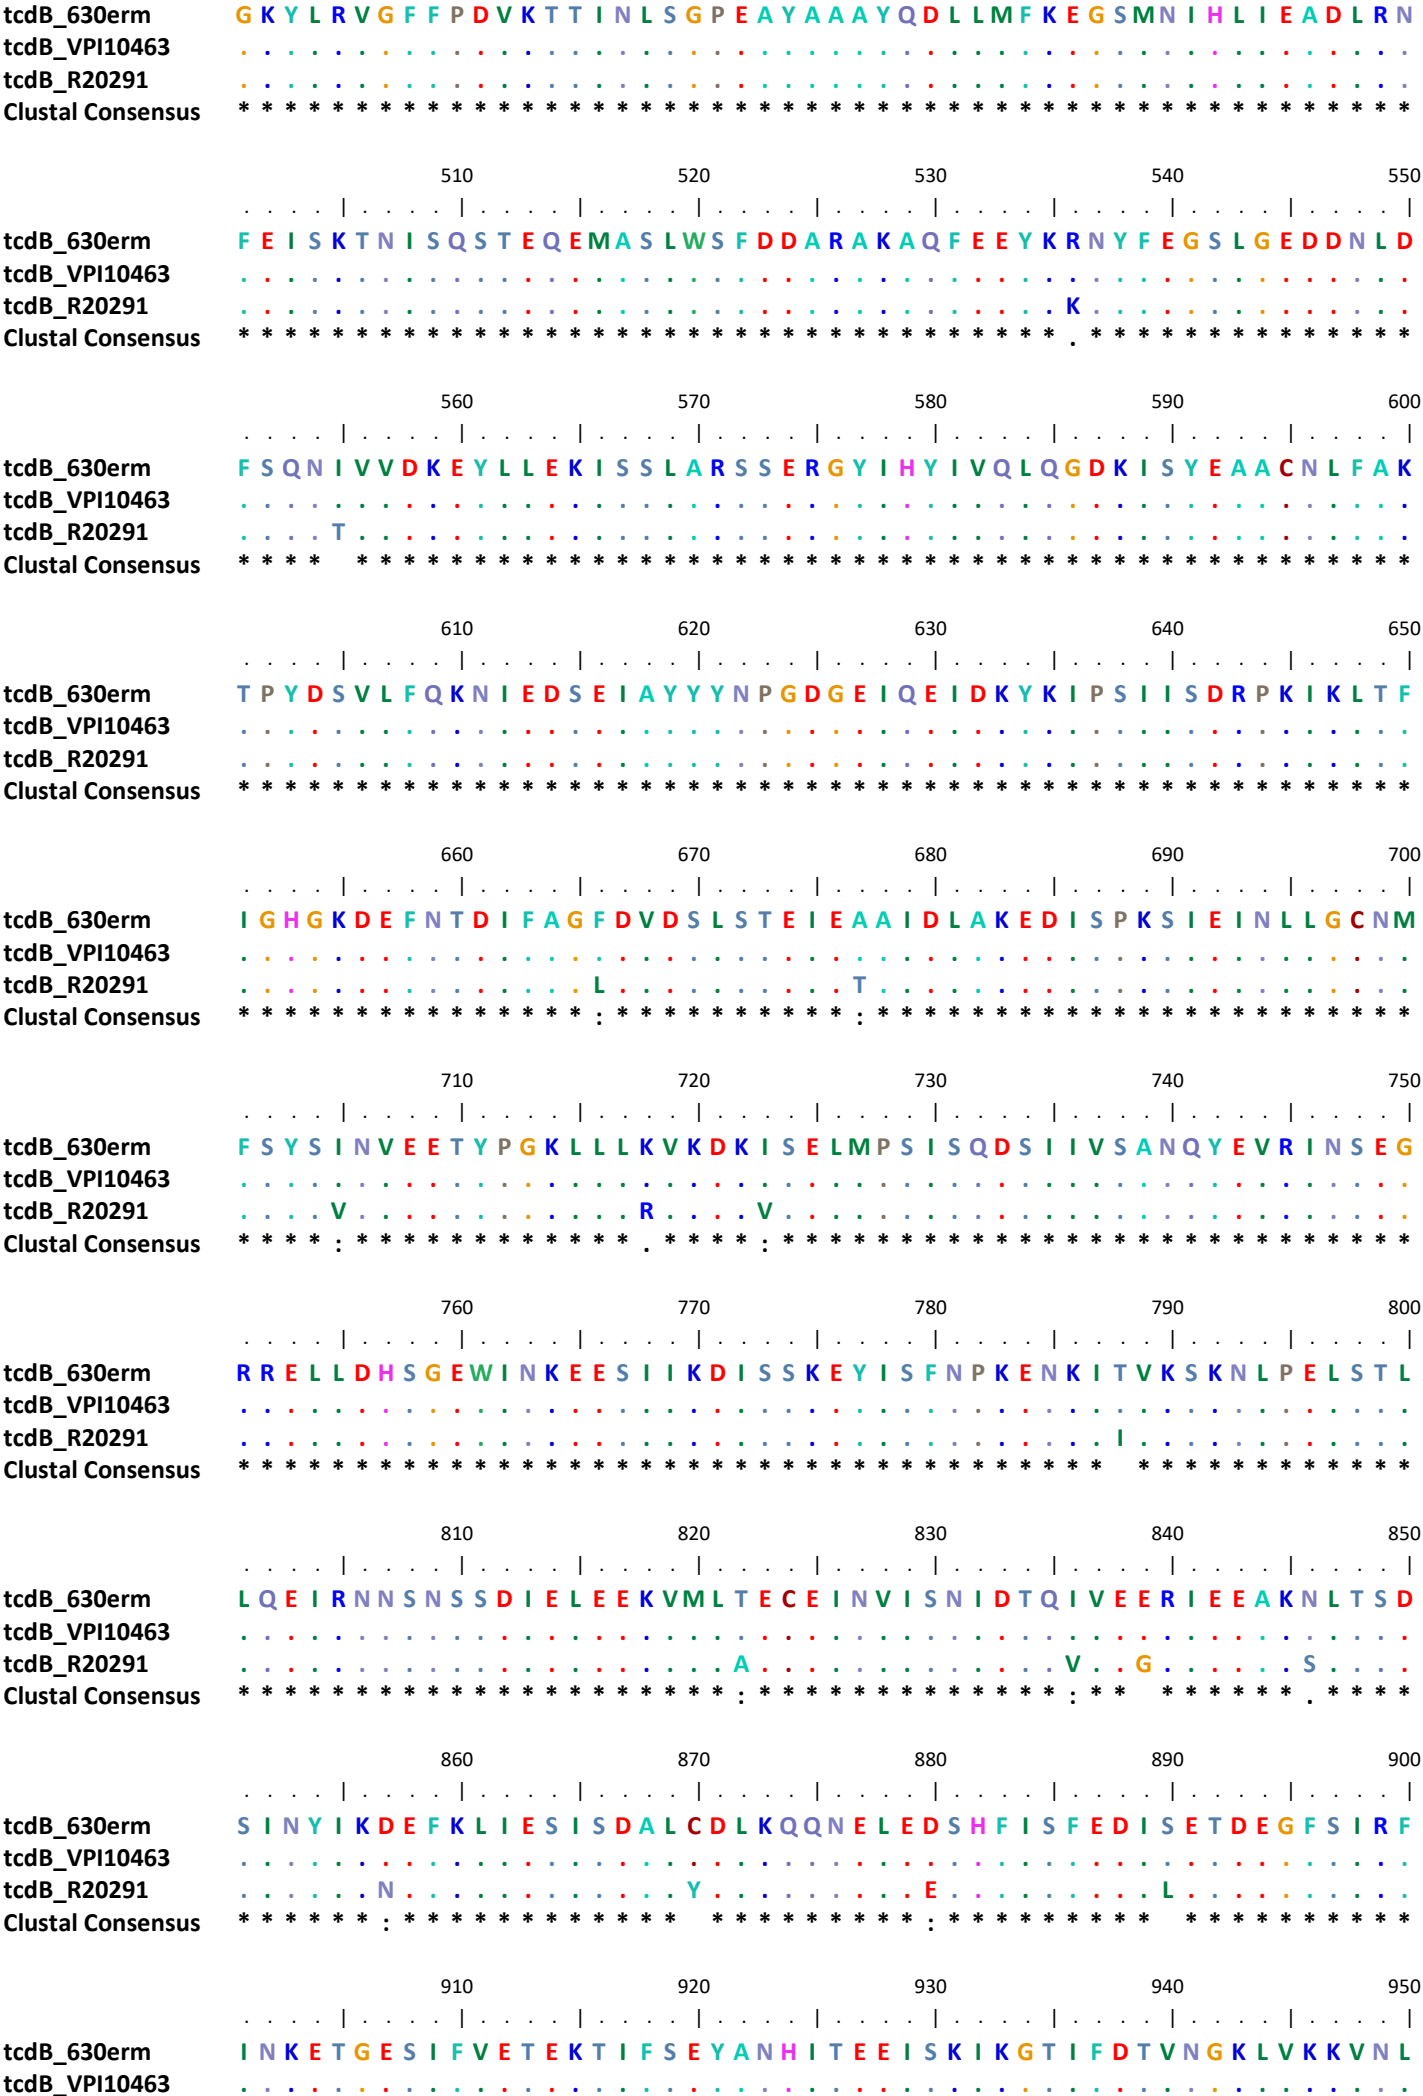

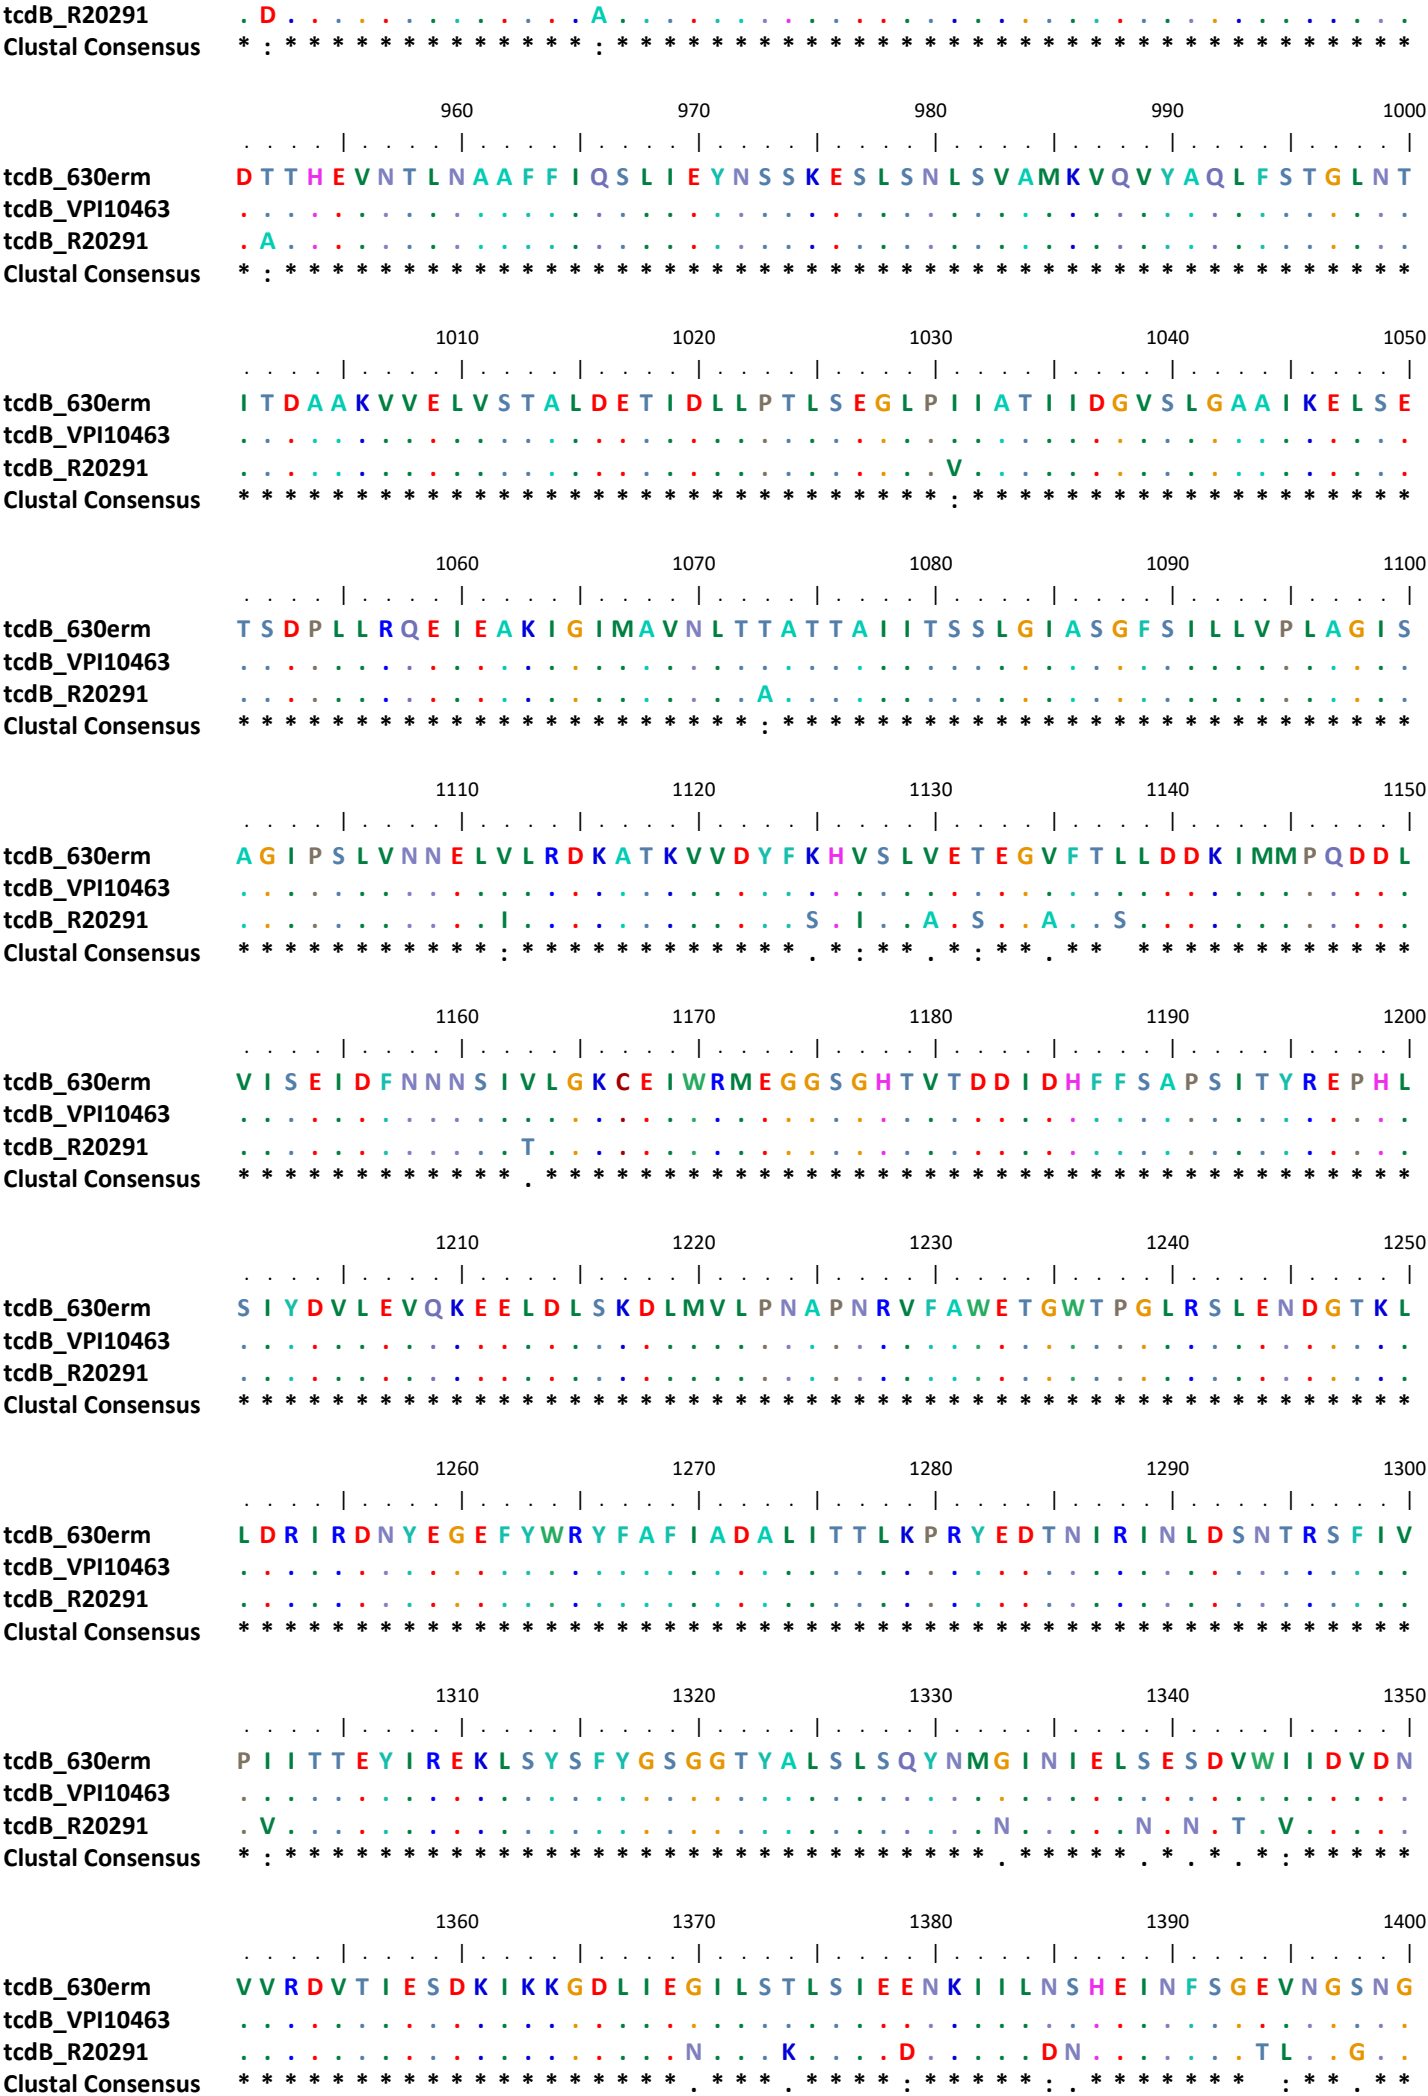



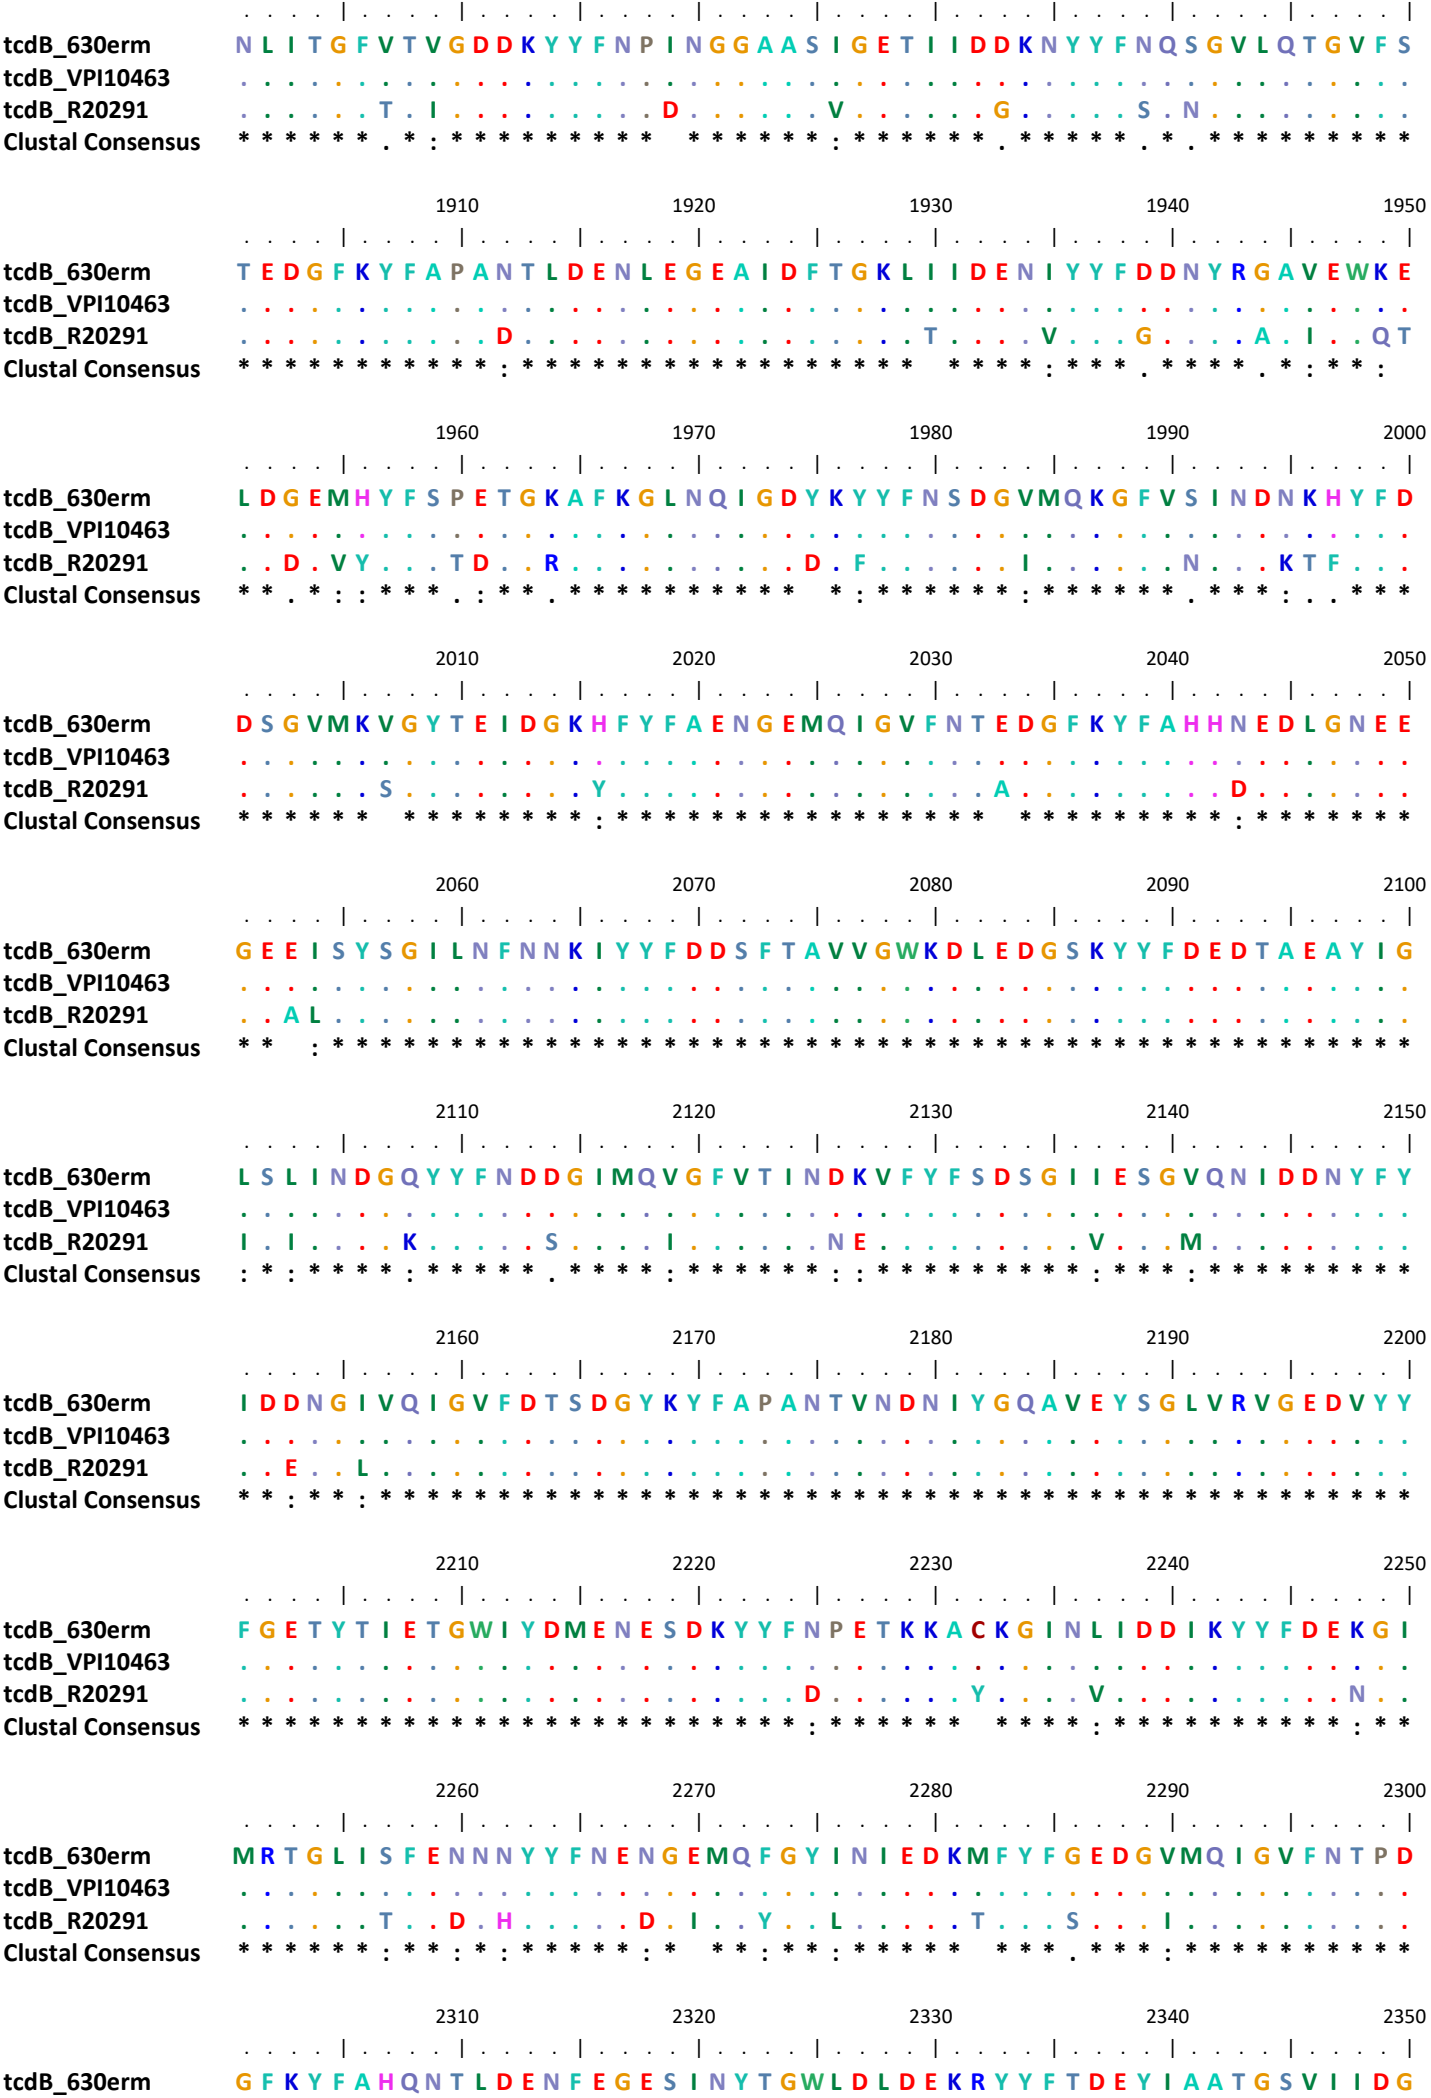

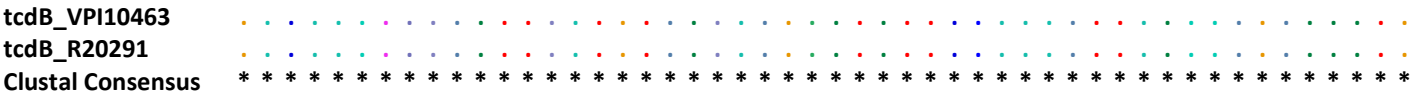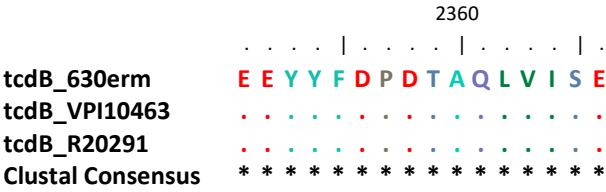

Supplement: s1 [file s1]
