# Supplementary material for: A Streamlined Method to Obtain Biologically Active TcdA and TcdB Toxins from Clostridioides difficile
Source: MDPI journal article supplement (doi:10.3390/toxins16010038), 2024-01-11
Supplement: s1 [file s1]

# A Streamlined Method to Obtain Biologically Active TcdA and TcdB Toxins from *Clostridioides difficile*

Diane Sapa <sup>1,†</sup>, Anaïs Brosse <sup>1,\*</sup>, Héloïse Coullon <sup>1</sup>, Gauthier Péan de Ponfilly <sup>1,2</sup>, Thomas Candela <sup>1,‡</sup>  
and Alban Le Monnier <sup>1,2,‡</sup>

<sup>1</sup> Micalis Institute, Université Paris-Saclay, INRAE, AgroParisTech, 78350 Jouy-en-Josas, France

<sup>2</sup> Service de Microbiologie Clinique, GH Paris Saint-Joseph, 75674 Paris, France

\* Correspondence: [anaïs.brosse@universite-paris-saclay.fr](mailto:anaïs.brosse@universite-paris-saclay.fr)

† Diane Sapa and Anaïs Brosse contributed equally to this work and share first authorship.

‡ Thomas Candela and Alban Le Monnier also contributed equally to this work and share last authorship.

## Supplementary Materials and Methods:

**DNase assay:** To assess whether DNA contamination could be an issue, DNA quantification was done before and after incubation with 70  $\mu\text{g.mL}^{-1}$  DNase I (CAS: 9003-98-9, Sigma Aldrich, MO, USA) for 2 hours at 37°C. In addition, positive control was included by spiking the mixture with 1  $\mu\text{L}$  of a DNA sample at 170.47  $\text{ng.}\mu\text{L}^{-1}$ .

**Western blot:** Purified recombinant toxins rTcdA and rTcdB were separated on 12% Mini-PROTEAN TGX Stain-Free Gels (Bio-Rad, CA, USA) and then transferred to a nitrocellulose membrane using Trans-Blot Turbo Transfer System (Bio-Rad, CA, USA) according to the manufacturer's instructions. Purified recombinant toxins rTcdA and rTcdB were detected using anti-His primary antibody (#2365S, Cell Signaling, MA, USA) diluted at 1:1000 and anti-rabbit horseradish peroxidase (HRP)-linked secondary antibody diluted at 1:20000 (GeneTex GTX213110-01, CA, USA). Antibody binding was revealed with SuperSignal™ West Pico PLUS Chemiluminescent Substrate (reference: 34580, Thermo Scientific, MA, USA) and revelation was performed on Fusion FX7 Imaging System (Vilber Lourmat, Eberhardzell, Germany).

**Toxin expression assay:** *C. difficile* strains AD3 and AD4 were cultured in 15 mL of BHI medium and allowed to grow overnight in an anaerobic chamber at 37°C and toxin expression was induced by the addition of ATc at 0.1  $\mu\text{g.mL}^{-1}$  or 0.5  $\mu\text{g.mL}^{-1}$  to 5 mL bacteria culture. Bacteria were centrifuged and culture supernatants were precipitated with 45 g of ammonium sulfate for 100 mL of bacterial culture followed by shaking at room temperature for 5 min. Precipitates were centrifuged (12200 g) for 10 min at 4°C, and the pellet was resuspended in 100  $\mu\text{L}$  of Laemmli sample buffer. For analysis, supernatant before (S) and after precipitation (CS) were loaded into a sodium dodecyl-sulfate polyacrylamide gel electrophoresis (SDS-PAGE) gel using 6% stacking gel and 10% separation gel followed by a standard Coomassie staining.

**Disclaimer/Publisher's Note:** The statements, opinions and data contained in all publications are solely those of the individual author(s) and contributor(s) and not of MDPI and/or the editor(s). MDPI and/or the editor(s) disclaim responsibility for any injury to people or property resulting from any ideas, methods, instructions or products referred to in the content.

**Citation:** Sapa, D.; Brosse, A.; Coullon, H.; Péan de Ponfilly, G.; Candela, T.; Le Monnier, A. A Streamlined Method to Obtain Biologically Active TcdA and TcdB Toxins from *Clostridioides difficile*. *Toxins* **2024**, *16*, 38. <https://doi.org/10.3390/toxins16010038>

Received: 25 September 2023

Revised: 15 December 2023

Accepted: 30 December 2023

Published: 11 January 2024

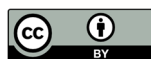

**Copyright:** © 2024 by the authors. Licensee MDPI, Basel, Switzerland. This article is an open access article distributed under the terms and conditions of the Creative Commons Attribution (CC BY) license (<https://creativecommons.org/licenses/by/4.0/>).
